# Supplementary material
Source: PubMed Central journal article supplement (PMC555499)

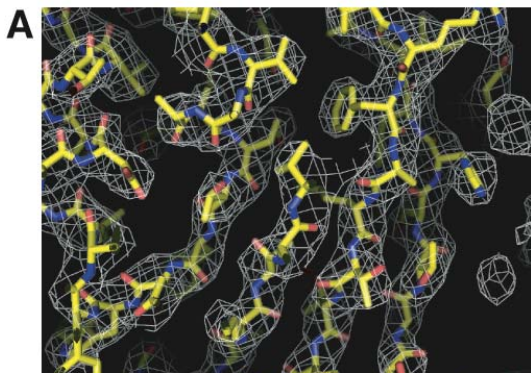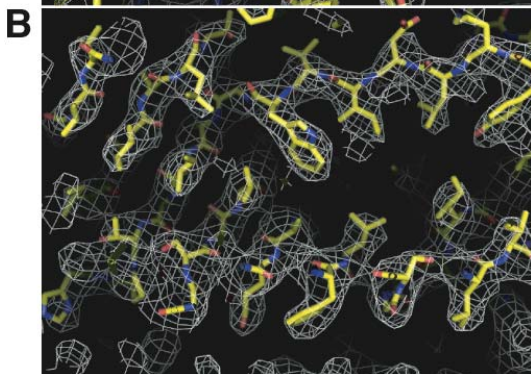

Supplement: pnas_102_12_4596__1.pdf [file pnas_102_12_4596__1.pdf]
